# Supplementary material for: Type discrimination and concentration prediction towards ethanol using a machine learning–enhanced gas sensor array with different morphology-tuning characteristics
Source: Royal Society of Chemistry journal article supplement (doi:10.1039/d1cp02394b), 2021-01-01
Supplement: d1cp02394b1.pdf [file d1cp02394b1.pdf]

## Supporting Information

### **Type discrimination and concentration prediction towards ethanol using machine learning enhanced gas sensor array with different morphology-tuning characteristics**

Tao Wang<sup>a</sup>, Hongli Ma<sup>a</sup>, Wenkai Jiang<sup>a</sup>, Hexin Zhang<sup>a</sup>, Min Zeng<sup>a,\*</sup>, Jianhua Yang<sup>a,\*</sup>,  
Xue Wang<sup>b</sup>, Ke Liu<sup>b,\*</sup>, Renhua Huang<sup>c</sup>, Zhi Yang<sup>a,\*</sup>

<sup>a</sup> Key Laboratory of Thin Film and Microfabrication (Ministry of Education),  
Department of Micro/Nano Electronics, School of Electronic Information and  
Electrical Engineering, Shanghai Jiao Tong University, Shanghai 200240, P. R. China.

<sup>b</sup> Department of Dermatology, Shanghai Ninth People's Hospital, Affiliated to  
Shanghai Jiao Tong University School of Medicine, Center for Specialty Strategy  
Research of Shanghai Jiao Tong University China Hospital Development Institute,  
Shanghai 200011, P. R. China.

<sup>c</sup> Department of Radiation, Renji Hospital, School of Medicine, Shanghai Jiao Tong  
University, Shanghai 200240, P. R. China

\*Corresponding authors, E-mail: minzeng@sjtu.edu.cn, yangjh08@sjtu.edu.cn,  
qq593783531@163.com, zhiyang@sjtu.edu.cn

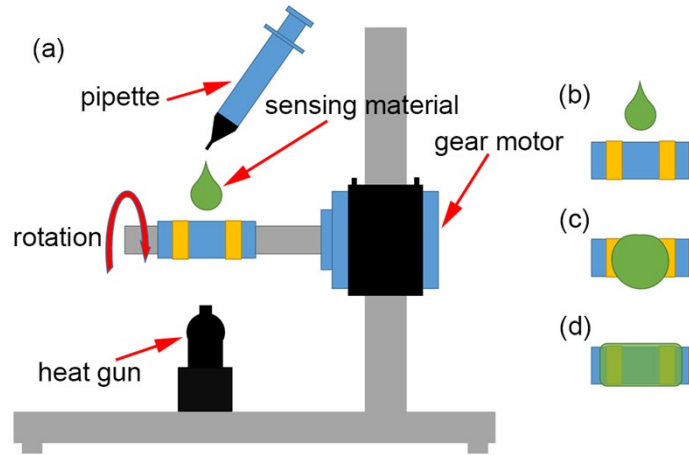

**Fig. S1.** (a) The home-made device for the construction of sensitive layer on ceramic tubes. (b, c, and d) The process of sensitive layer formation.

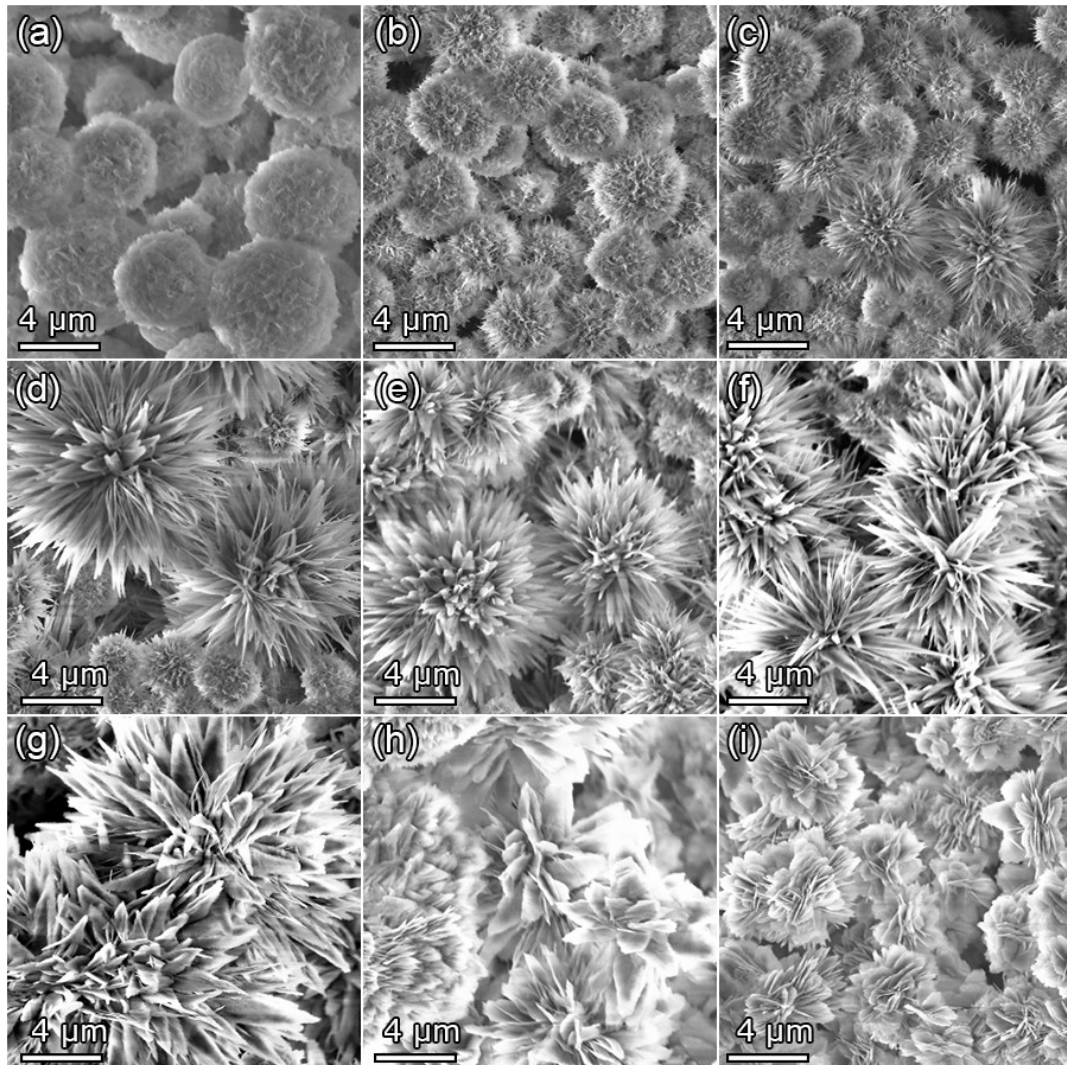

**Fig. S2.** SEM images of ZnO precursors and the corresponding urea content is (a) 0.5 g, (b) 1 g, (c) 1.5 g, (d) 2 g, (e) 2.5 g, (f) 3 g, (g) 6 g, (h) 12 g and (i) 30 g, respectively.

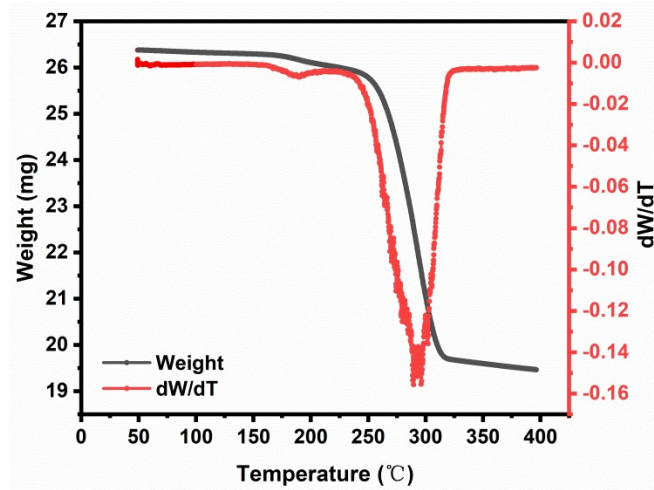

**Fig. S3.** TGA curve and its corresponding differential curve ( $dW/dT$ ) of ZnO precursor (Pre-ZnO-30).

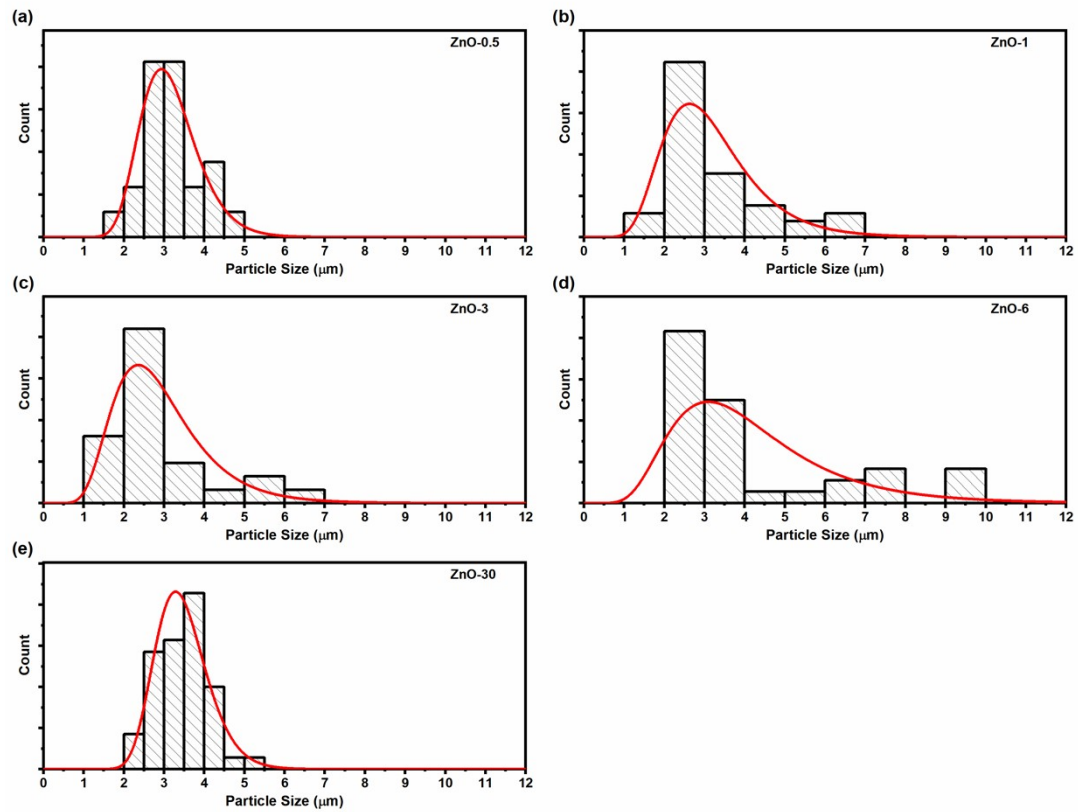

**Fig. S4.** Particle size distribution of (a) ZnO-0.5, (b) ZnO-1, (c) ZnO-3, (d) ZnO-6 and (e) ZnO-30, respectively.

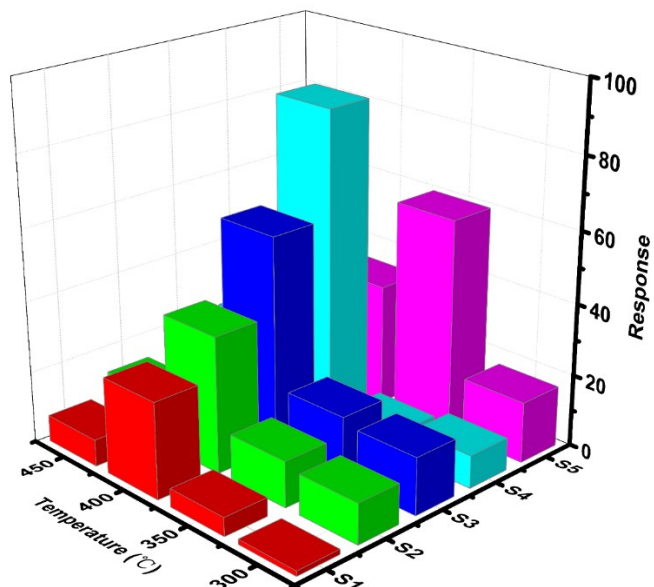

**Fig. S5.** Response of S1-S5 to ethanol at different working temperatures.

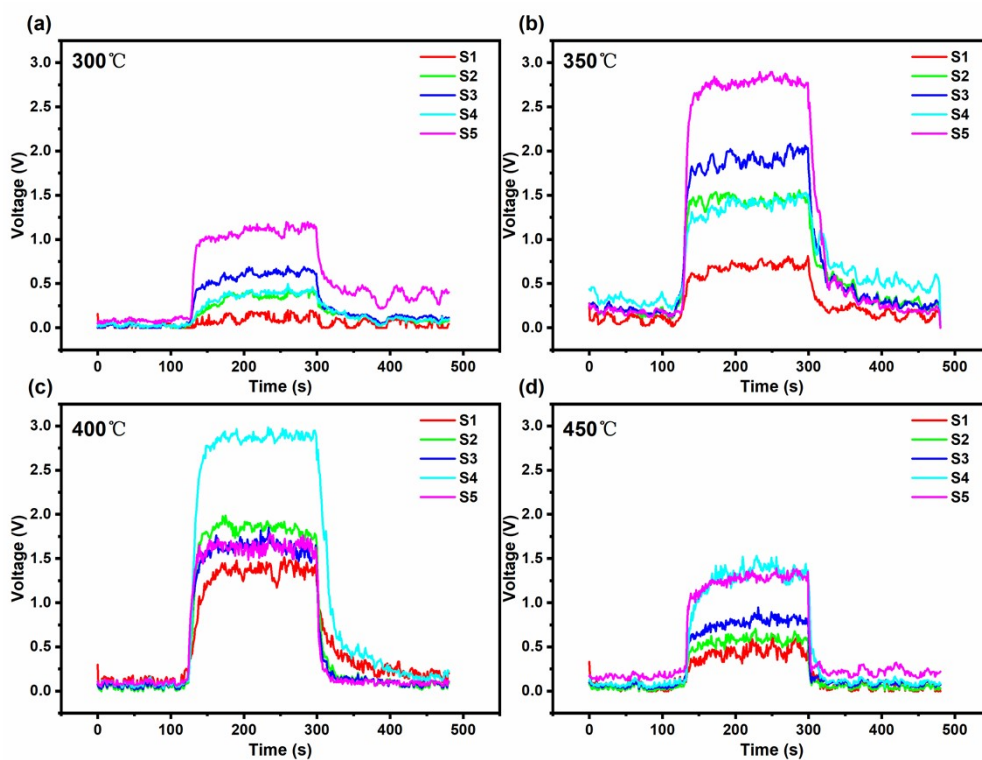

**Fig. S6.** Response and recovery curves of different gas sensors to ethanol at different working temperatures: (a) 300 °C, (b) 350 °C, (c) 400 °C and (d) 450 °C, respectively.

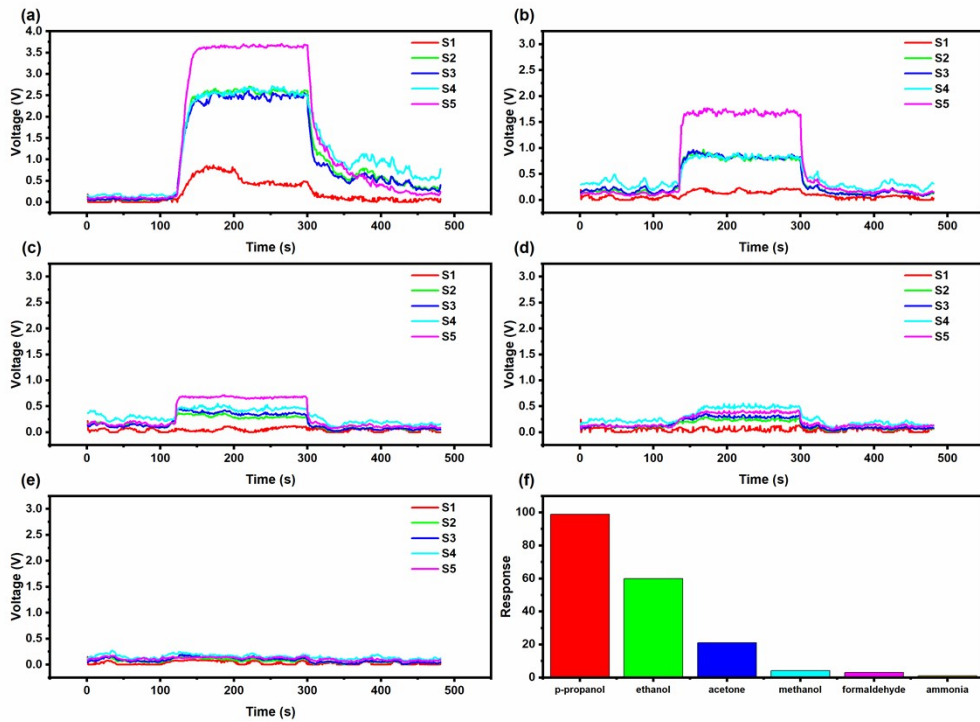

**Fig. S7.** Response curves of different gas detectors at 350 °C towards 100 ppm of (a) p-propanol, (b) acetone, (c) methanol, (d) formaldehyde and (e) ammonia, respectively. (f) Response values of S5 at 350 °C towards 100 ppm of p-propanol, ethanol, acetone, methanol, formaldehyde and ammonia, respectively.

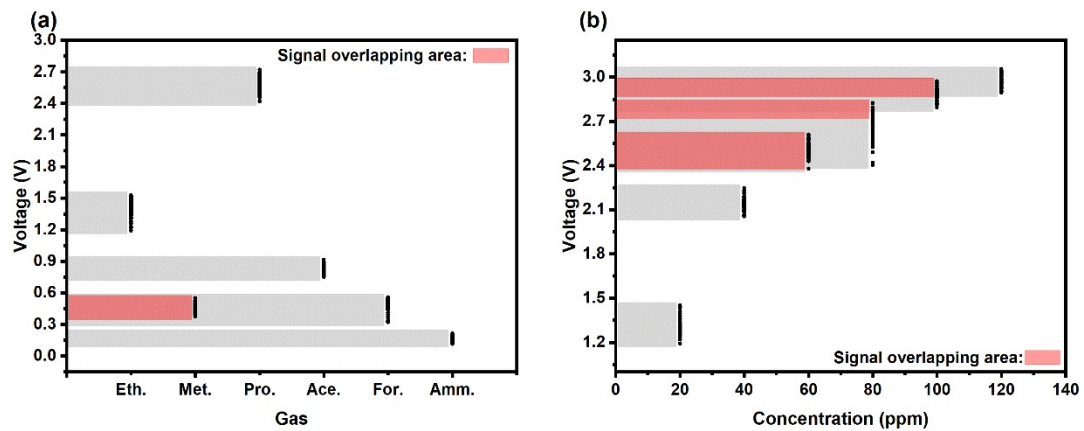

**Fig. S8.** (a) Signal overlapping area of S4 to different kinds of gases. (b) Signal overlapping areas of S5 to different concentrations of ethanol.
